# Supplementary material
Source: MDPI journal article supplement (https://www.mdpi.com/2073-4441/5/2/443)
Supplement: s1 [file s1]

*Correction*

# **Rex, J., et al. Mountain Pine Beetles, Salvage Logging, and Hydrologic Change: Predicting Wet Ground Areas. *Water* 2013, 5, 443–461**

**John Rex \*, Stéphane Dubé and Vanessa Foord**

Ministry of Forests, Lands & Natural Resource Operations, 5th Floor, 1044 5th Avenue Prince George, BC V2L5G4, Canada; E-Mails: stephane.dube@gov.bc.ca (S.D.); vanessa.foord@gov.bc.ca (V.F.)

\* Author to whom correspondence should be addressed; E-Mail: john.rex@gov.bc.ca;  
Tel.: +1-250-565-6921; Fax: +1-250-565-6671.

*Received: 6 September 2013 / Accepted: 16 September 2013 / Published: 18 September 2013*

---

The authors wish to acknowledge a funding agency in their recently published paper [1] and make the following correction.

## **Acknowledgments**

The authors would like to thank Phillip Krauskopf, Maria Fe Saraiva, Megan Campbell, Cindy Chevalier and Amy Barnes for field support. This project was funded by Natural Resources Canada, Canadian Forest Service, Mountain Pine Beetle Initiative and this paper was adapted from Mountain Pine Beetle Working Paper 2009-05. Figures and tables were reproduced with permission from the Minister of Public Works and Government Services, Canada, 2013.

## **References**

1. Rex, J.; Dubé, S.; Foord, V. Mountain Pine Beetles, Salvage Logging, and Hydrologic Change: Predicting Wet Ground Areas. *Water* **2013**, *5*, 443–461.

© 2013 by the authors; licensee MDPI, Basel, Switzerland. This article is an open access article distributed under the terms and conditions of the Creative Commons Attribution license (<http://creativecommons.org/licenses/by/3.0/>).
